# Supplementary material
Source: publisher figshare collection journal article supplement (https://gsajournals.figshare.com/articles/dataset/_/7977044)

# QUAST

## Quality Assessment Tool for Genome Assemblies by CAB

24 January 2018, Wednesday, 23:03:33

[View in Icarus contig browser](#)All statistics are based on contigs of size  $\geq 3000$  bp, unless otherwise noted (e.g., "# contigs ( $\geq 0$  bp)" and "Total length ( $\geq 0$  bp)" include all contigs).

Aligned to "GRCm38\_p5\_no\_chrY" | 2 639 127 076 bp | 65 fragments | 41.76% G+C


 Show heatmap

| Genome statistics                   | B6Eve              | B6Eve_broken       |
|-------------------------------------|--------------------|--------------------|
| Genome fraction (%)                 | 96.848             | 96.841             |
| Duplication ratio                   | 1.123              | 1.017              |
| # genomic features                  | 22 994 + 2144 part | 22 953 + 2182 part |
| Largest alignment                   | 5 570 225          | 4 577 372          |
| Total aligned length                | 2 526 660 255      | 2 525 333 977      |
| NG50                                | 1 390 099          | 371 965            |
| NG75                                | 439 613            | 151 056            |
| NA50                                | 422 265            | 384 295            |
| NA75                                | 115 689            | 168 024            |
| NCA50                               | 476 164            | 365 098            |
| NCA75                               | 146 696            | 146 364            |
| LG50                                | 524                | 1757               |
| LG75                                | 1281               | 4525               |
| LA50                                | 1516               | 1657               |
| LA75                                | 4821               | 4140               |
| LGA50                               | 1336               | 1793               |
| LGA75                               | 3885               | 4626               |
| <b>Misassemblies</b>                |                    |                    |
| # misassemblies                     | 2590               | 1306               |
| # relocations                       | 1735               | 557                |
| # translocations                    | 827                | 724                |
| # inversions                        | 28                 | 25                 |
| # misassembled contigs              | 1714               | 1166               |
| Misassembled contigs length         | 1 509 562 627      | 220 209 949        |
| # local misassemblies               | 3529               | 2962               |
| # scaffold gap size mis.            | 88                 | -                  |
| # possible MGEs                     | 18                 | 16                 |
| # unaligned mis. contigs            | 69                 | 51                 |
| <b>Unaligned</b>                    |                    |                    |
| # fully unaligned contigs           | 166                | 21 642             |
| Fully unaligned length              | 3 719 105          | 3 869 437          |
| # partially unaligned contigs       | 2456               | 1793               |
| Partially unaligned length          | 7 251 439          | 6 820 765          |
| <b>Mismatches</b>                   |                    |                    |
| # mismatches                        | 321 280            | 320 246            |
| # indels                            | 494 061            | 492 931            |
| Indels length                       | 3 818 564          | 2 606 030          |
| # mismatches per 100 kbp            | 12.93              | 12.89              |
| # indels per 100 kbp                | 19.89              | 19.85              |
| # indels ( $\leq 5$ bp)             | 465 708            | 464 749            |
| # indels ( $> 5$ bp)                | 28 353             | 28 182             |
| # N's                               | 263 669 715        | 422                |
| # N's per 100 kbp                   | 9412.42            | 0.02               |
| <b>Statistics without reference</b> |                    |                    |
| # contigs                           | 12 658             | 36 182             |
| # contigs ( $\geq 0$ bp)            | 12 661             | -                  |
| # contigs ( $\geq 1000$ bp)         | 12 661             | -                  |
| # contigs ( $\geq 5000$ bp)         | 12 656             | 14 704             |
| # contigs ( $\geq 10000$ bp)        | 12 645             | 14 693             |
| # contigs ( $\geq 25000$ bp)        | 9722               | 11 770             |
| # contigs ( $\geq 50000$ bp)        | 6787               | 8835               |
| Largest contig                      | 9 177 662          | 4 577 433          |
| Total length                        | 2 801 295 686      | 2 537 626 393      |
| Total length ( $\geq 0$ bp)         | 2 801 301 292      | -                  |
| Total length ( $\geq 1000$ bp)      | 2 801 301 292      | -                  |
| Total length ( $\geq 5000$ bp)      | 2 801 286 582      | 2 537 466 957      |
| Total length ( $\geq 10000$ bp)     | 2 801 206 759      | 2 537 387 134      |
| Total length ( $\geq 25000$ bp)     | 2 741 388 976      | 2 477 569 351      |
| Total length ( $\geq 50000$ bp)     | 2 638 542 761      | 2 374 723 136      |
| N50                                 | 1 291 016          | 391 273            |
| N75                                 | 233 769            | 172 412            |
| L50                                 | 585                | 1624               |
| L75                                 | 1674               | 4053               |
| GC (%)                              | 41.8               | 41.8               |
| <b>K-mer-based statistics</b>       |                    |                    |
| K-mer-based completeness            | 97.38              | 97.38              |
| K-mer-based cor. length (%)         | 74.76              | 87.29              |
| K-mer-based mis. length (%)         | 24.45              | 11.86              |
| K-mer-based undef. length (%)       | 0.78               | 0.85               |
| # k-mer-based misjoins              | 1568               | 1493               |
| # k-mer-based translocations        | 1091               | 1024               |
| # k-mer-based 100kbp relocations    | 477                | 469                |
| <b>Similarity statistics</b>        |                    |                    |
| # similar correct contigs           | 9448               | 9448               |
| # similar misassembled blocks       | 3598               | 3598               |

[Short report](#)

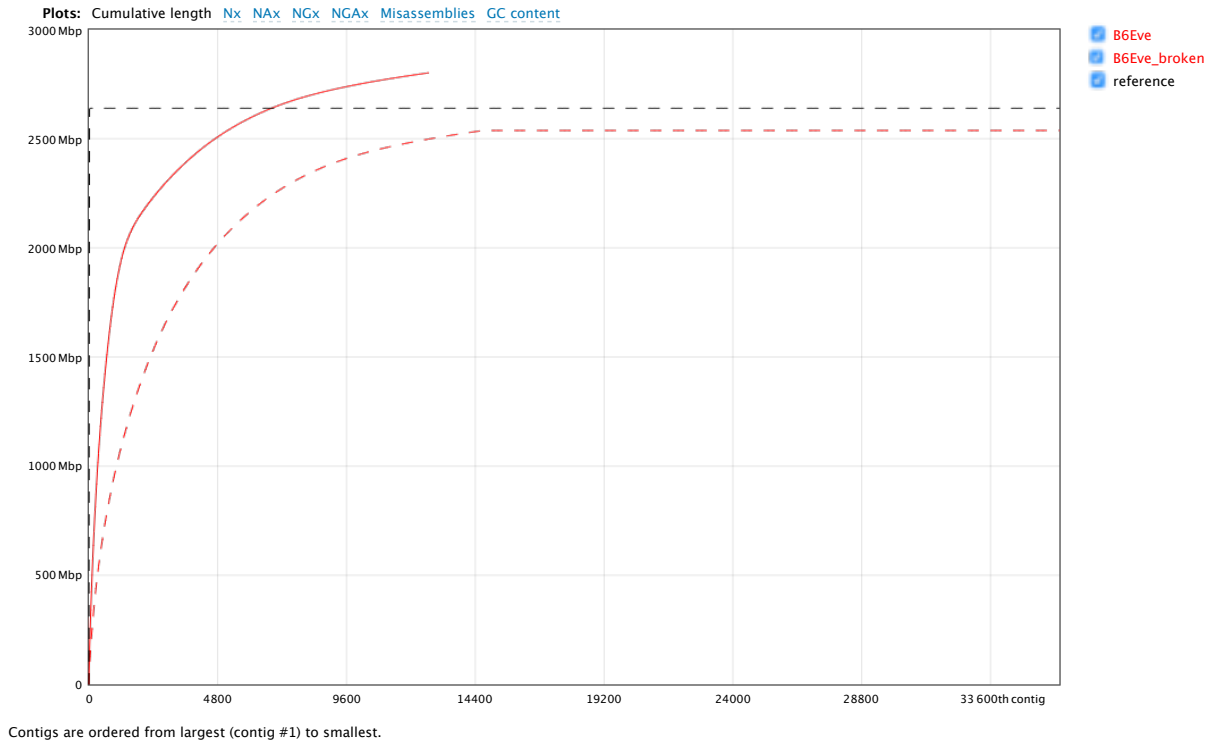

Supplement: Supplementary file 1 [file 1]
