# Supplementary material
Source: publisher figshare collection journal article supplement (https://gsajournals.figshare.com/articles/dataset/_/7977044)
Supplement: Supplementary file [file 1]

HYBRID\_SCAFFOLD\_Super-Scaffold\_402:1,651,017-1,656,516 (5,500 bp)

CAT Annotation

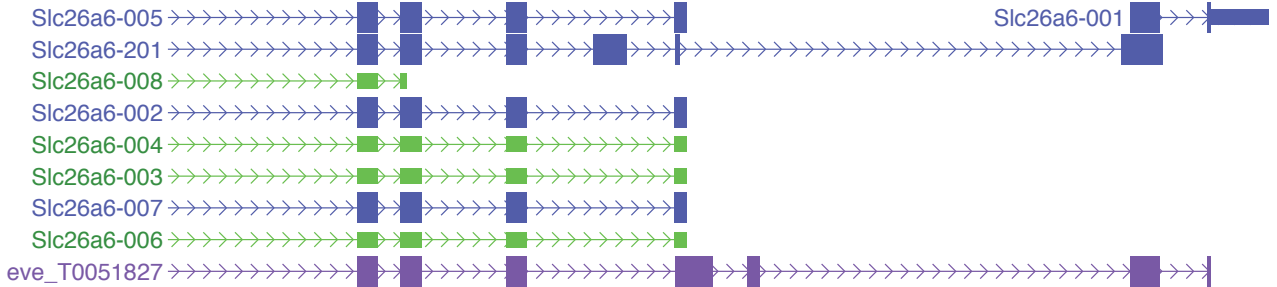

transMap

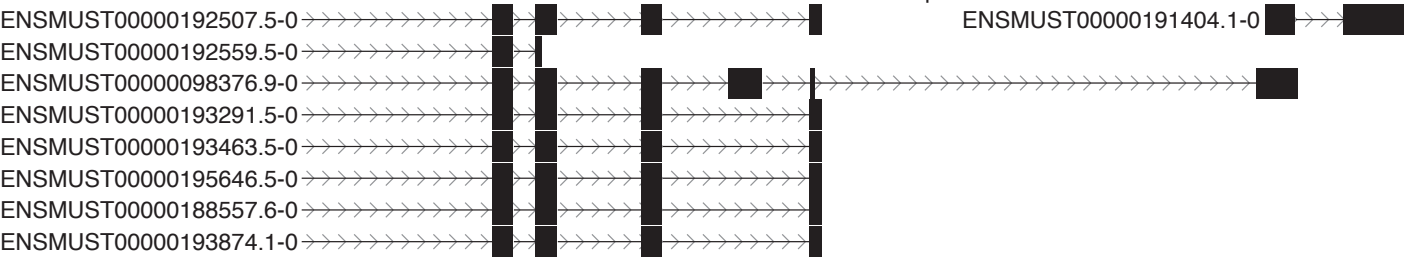

GRCm38

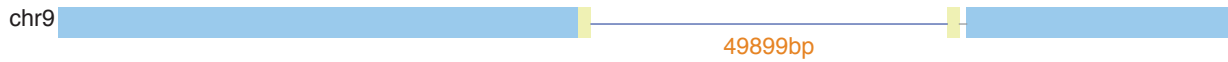

Eve IsoSeq alignments

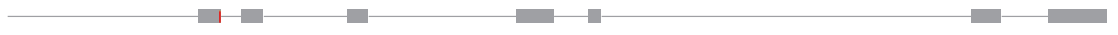

chr9:108,852,821-108,921,536 (68,716 bp)

Basic Gene Annotation Set from GENCODE Version M14 (Ensembl 89)

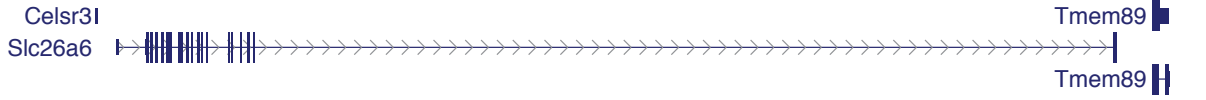

Assembly from Fragments

GL456151.2

GL456152.2
