# Supplementary material
Source: publisher figshare collection journal article supplement (https://gsajournals.figshare.com/articles/dataset/_/7977044)

HYBRID\_SCAFFOLD\_Super-Scaffold\_8976:408,462-422,561 (14,100 bp)

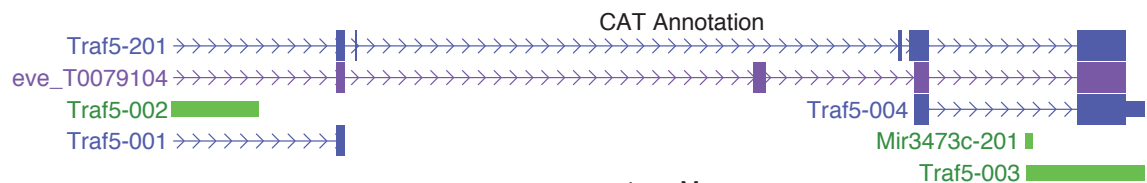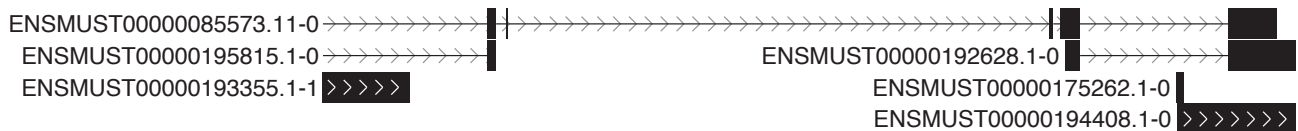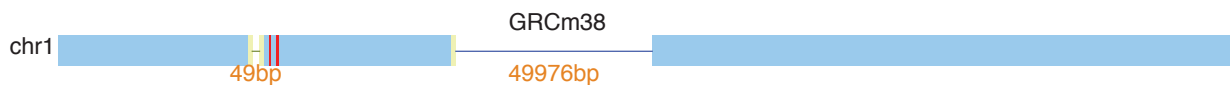

Eve IsoSeq alignments

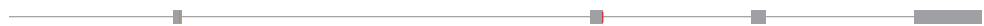

chr1:191,997,430-192,070,634 (73,205 bp)

Your Sequence from Blat Search

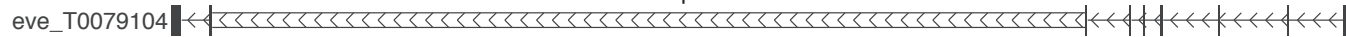

Basic Gene Annotation Set from GENCODE Version M16 (Ensembl 91)

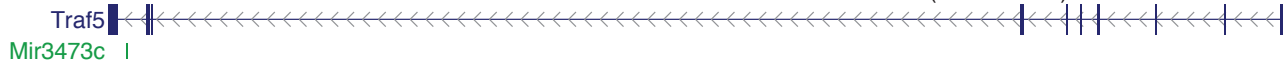

Assembly from Fragments

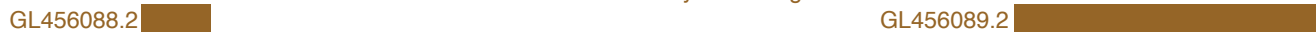

Supplement: Supplementary file [file 1]
