# Supplementary material
Source: publisher figshare collection journal article supplement (https://gsajournals.figshare.com/articles/dataset/_/7977044)

Position of SNPs Resulting from B6Eve Illumina Mapping to B6Eve Assembly

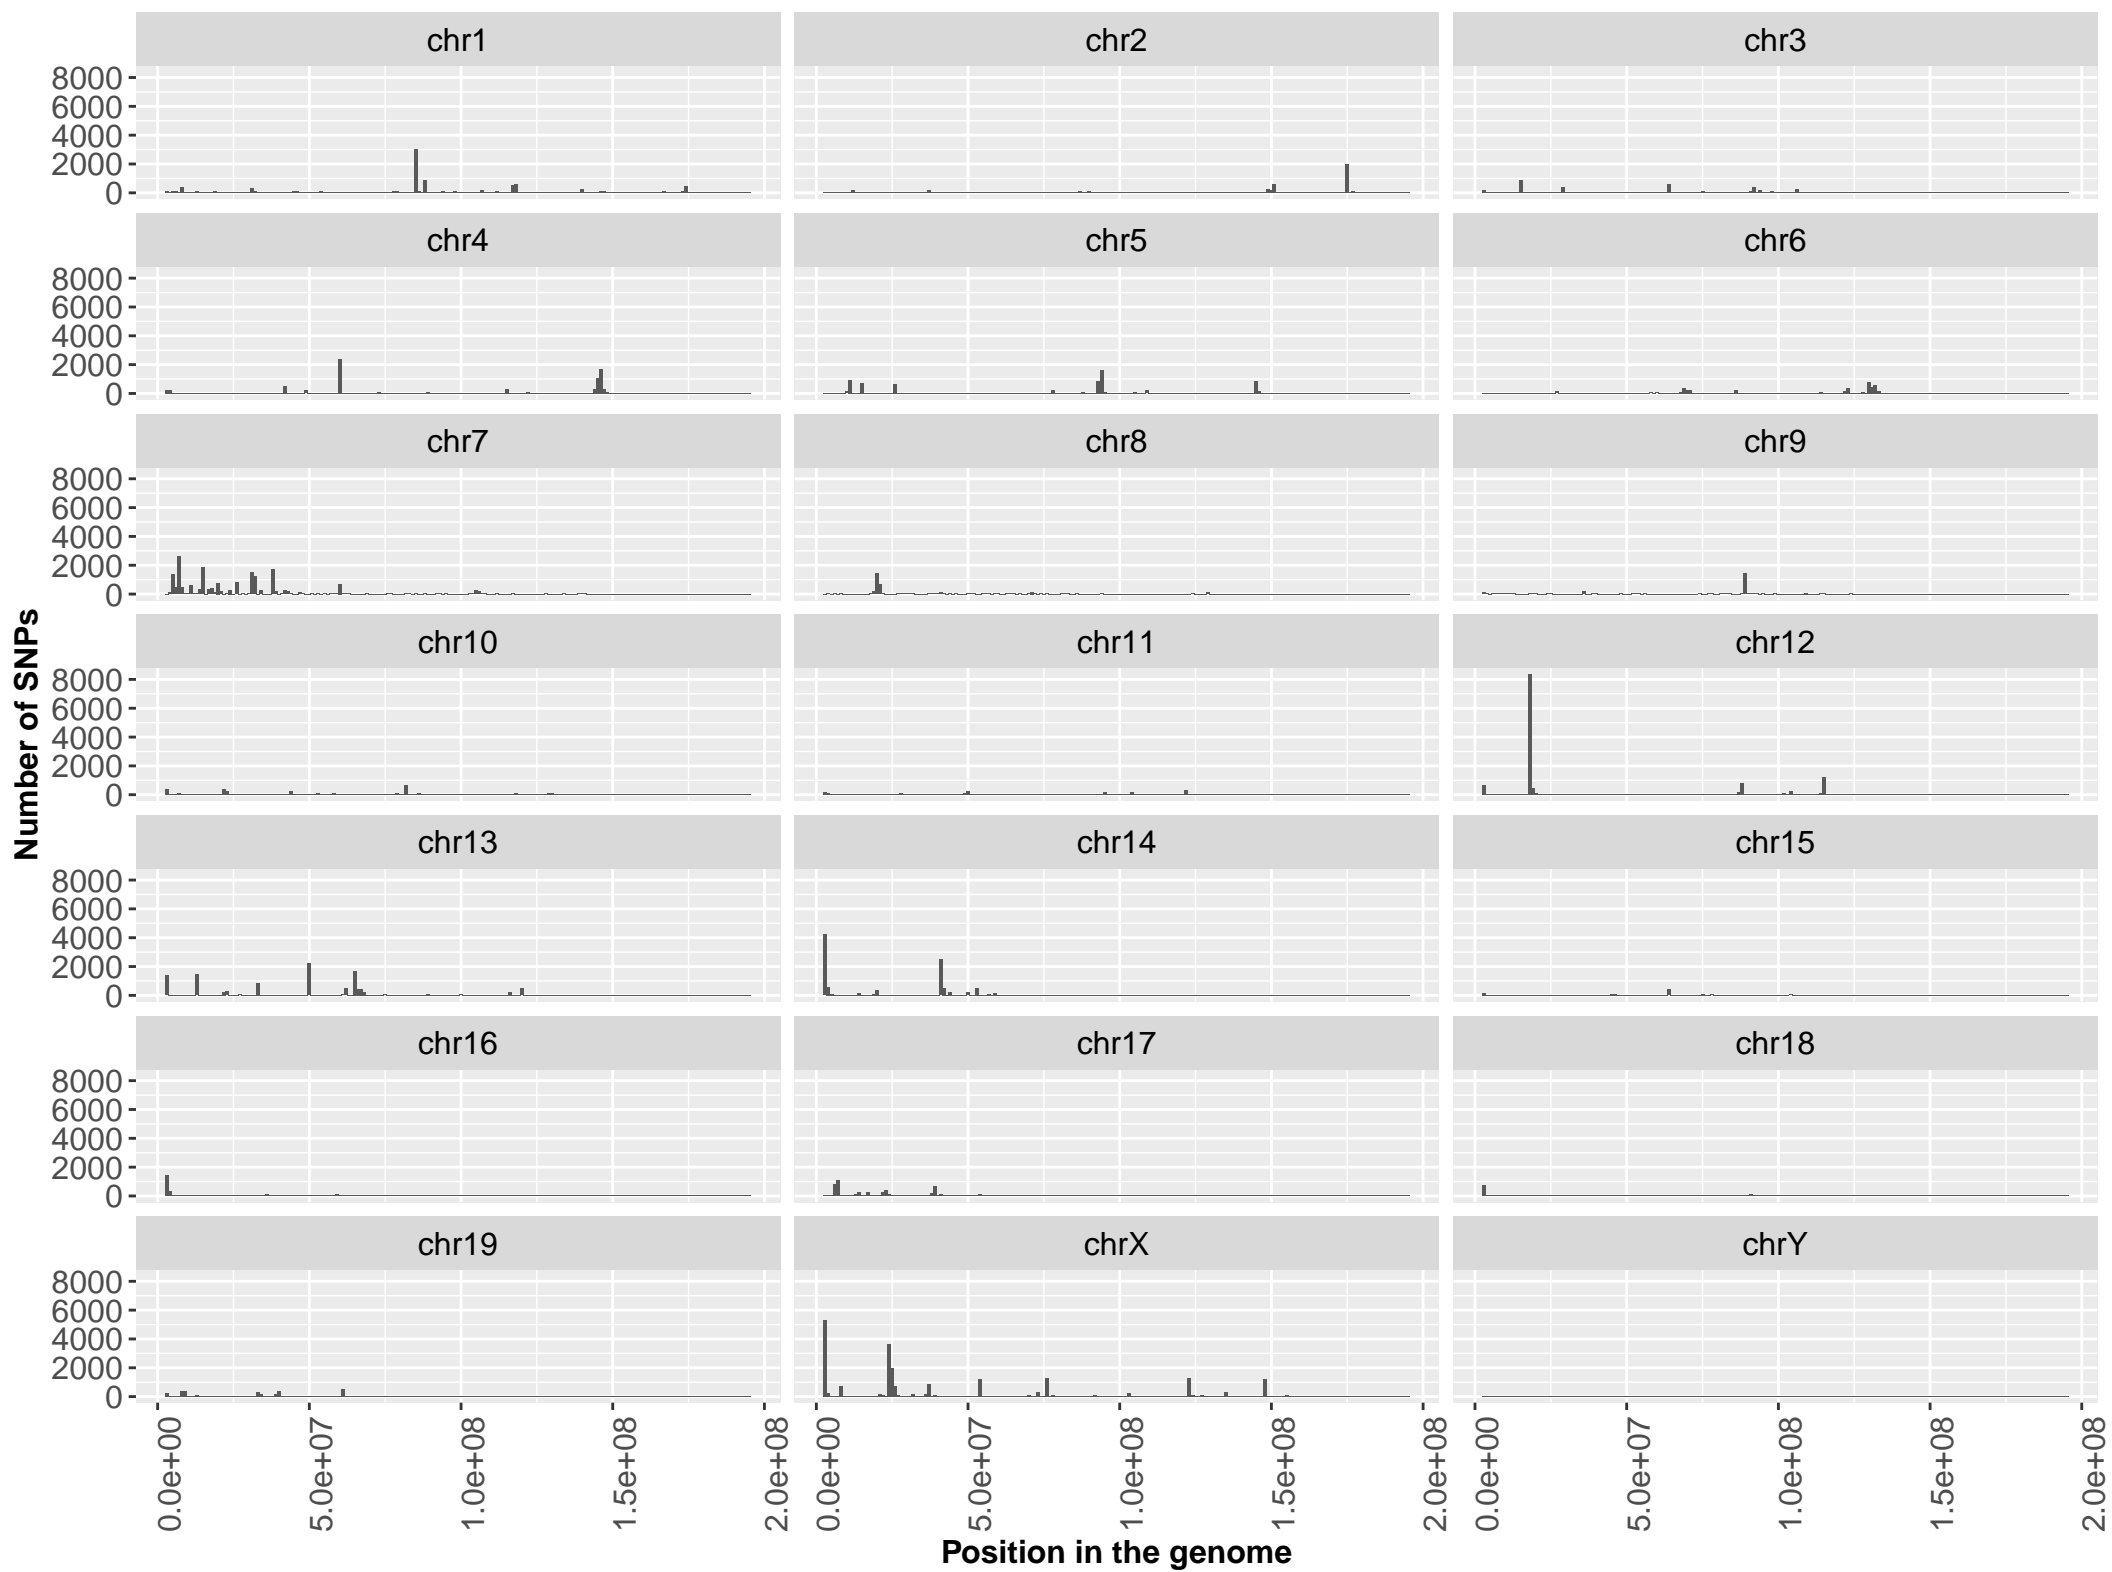

Supplement: Supplementary file 2 [file 1]

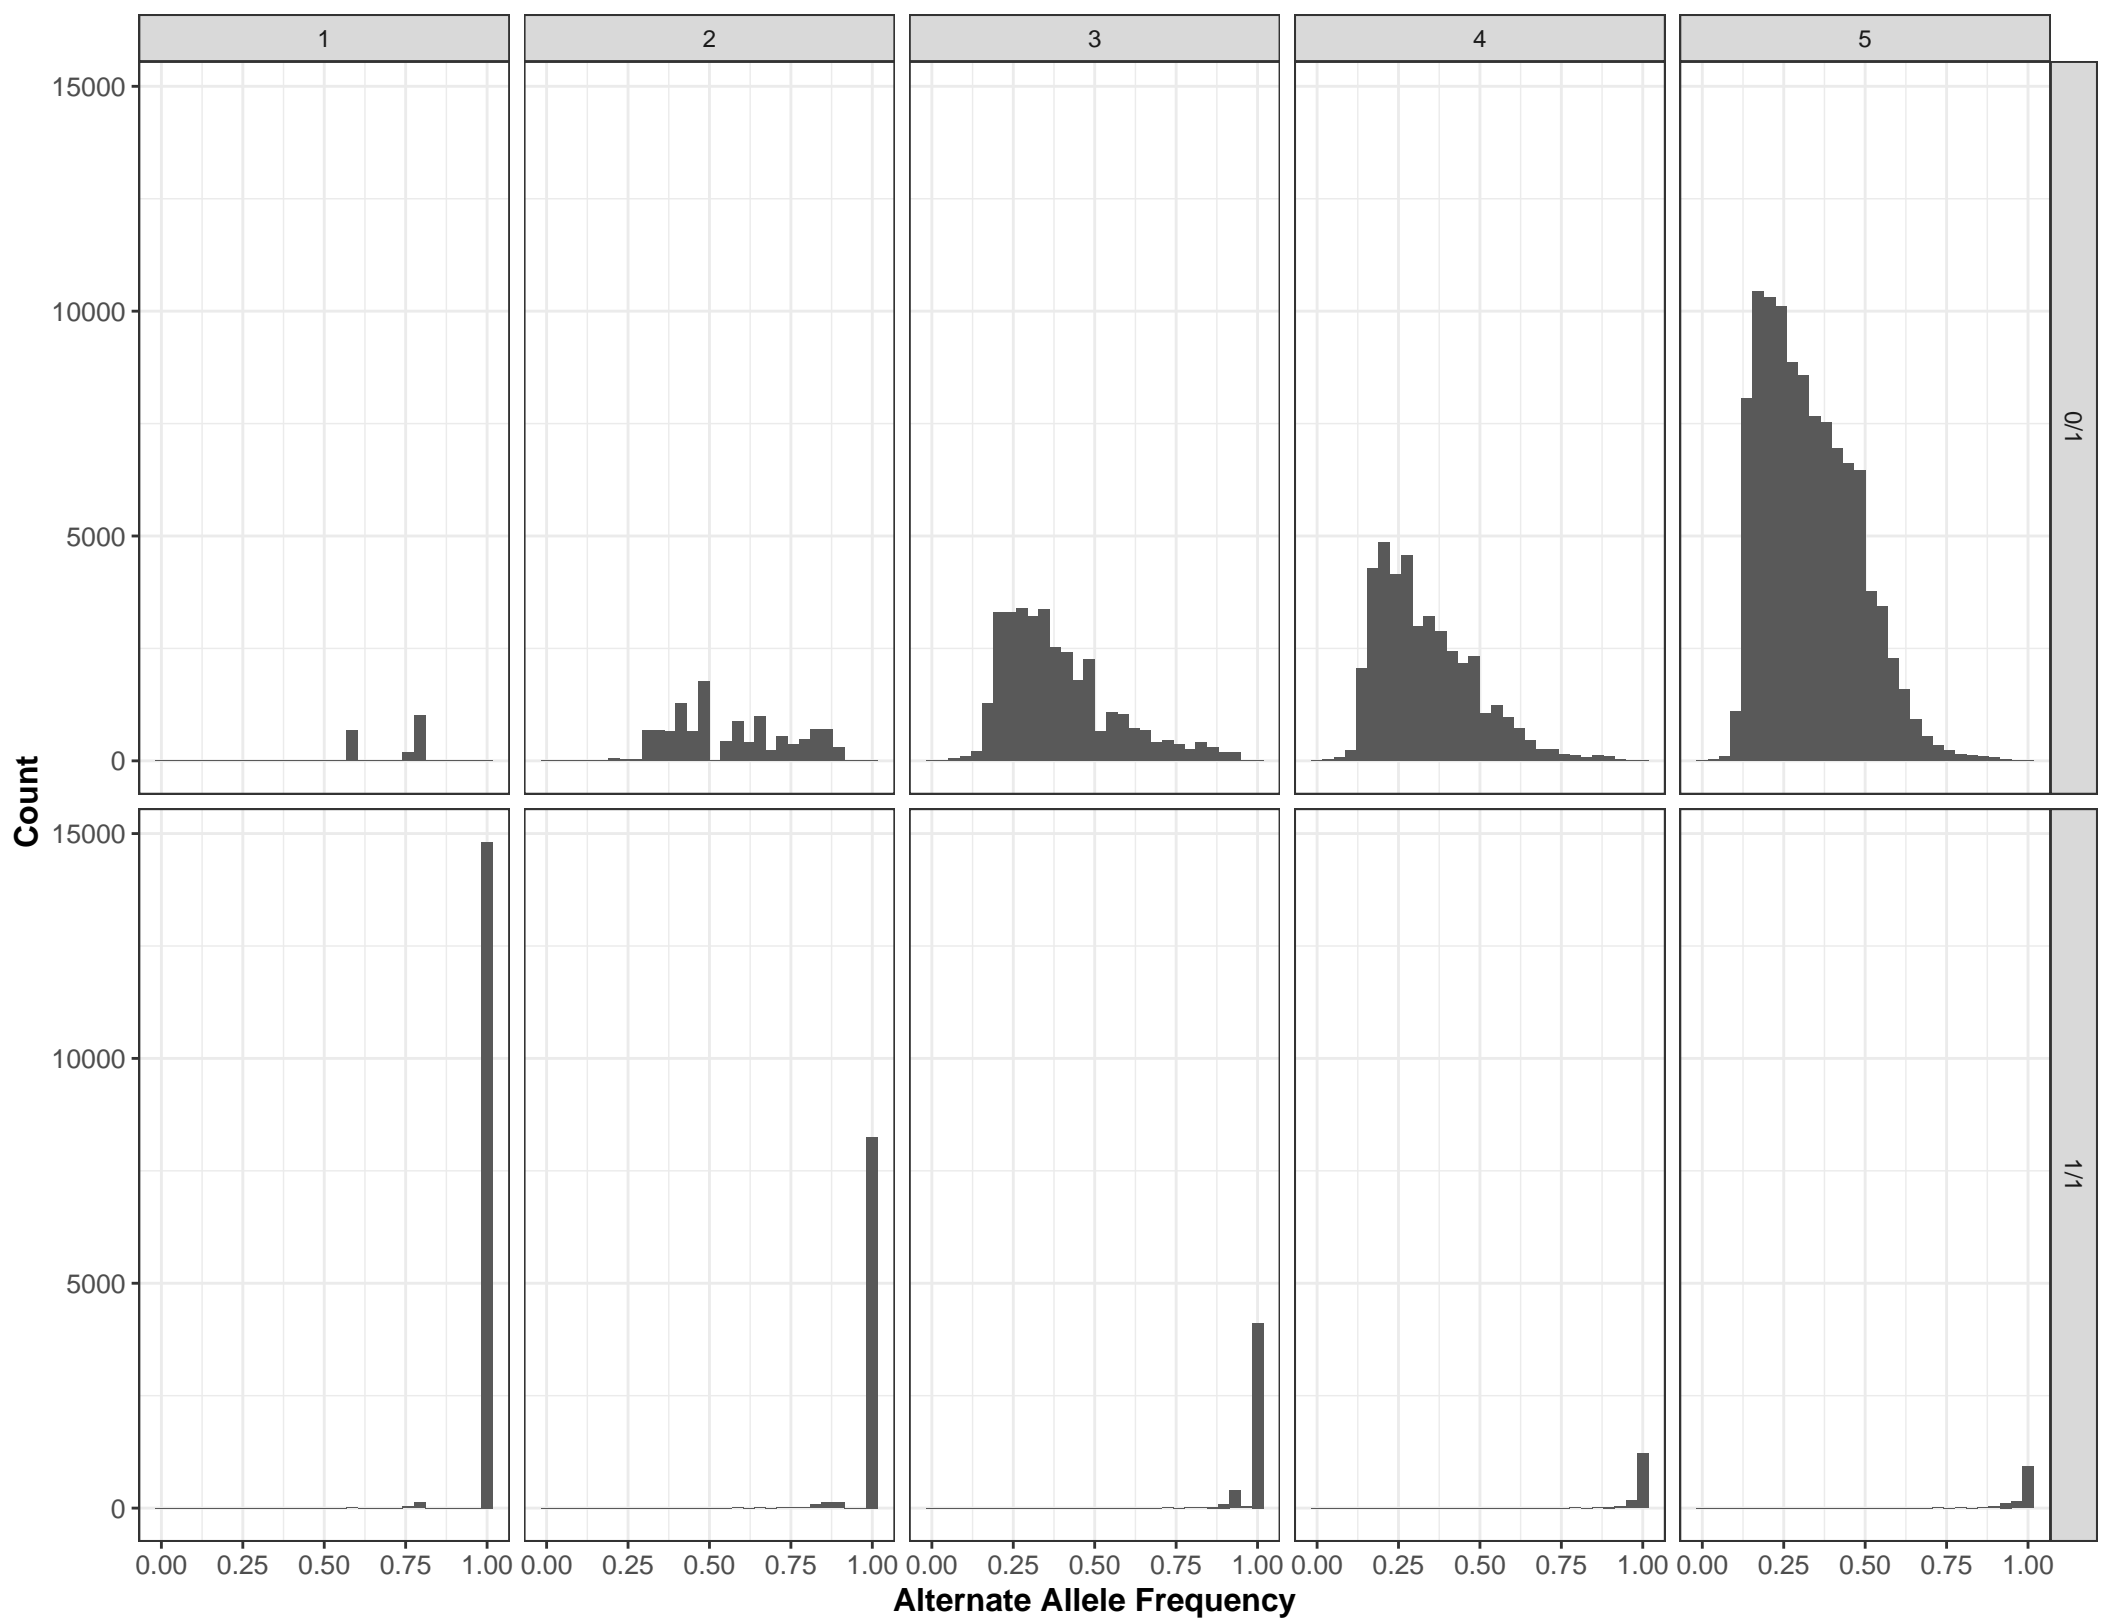

Supplement: Supplementary file 3 [file 1]

Position of Common SNPs Resulting from B6Eve Illumina Mapping to B6Eve and GRCm38 Assembly

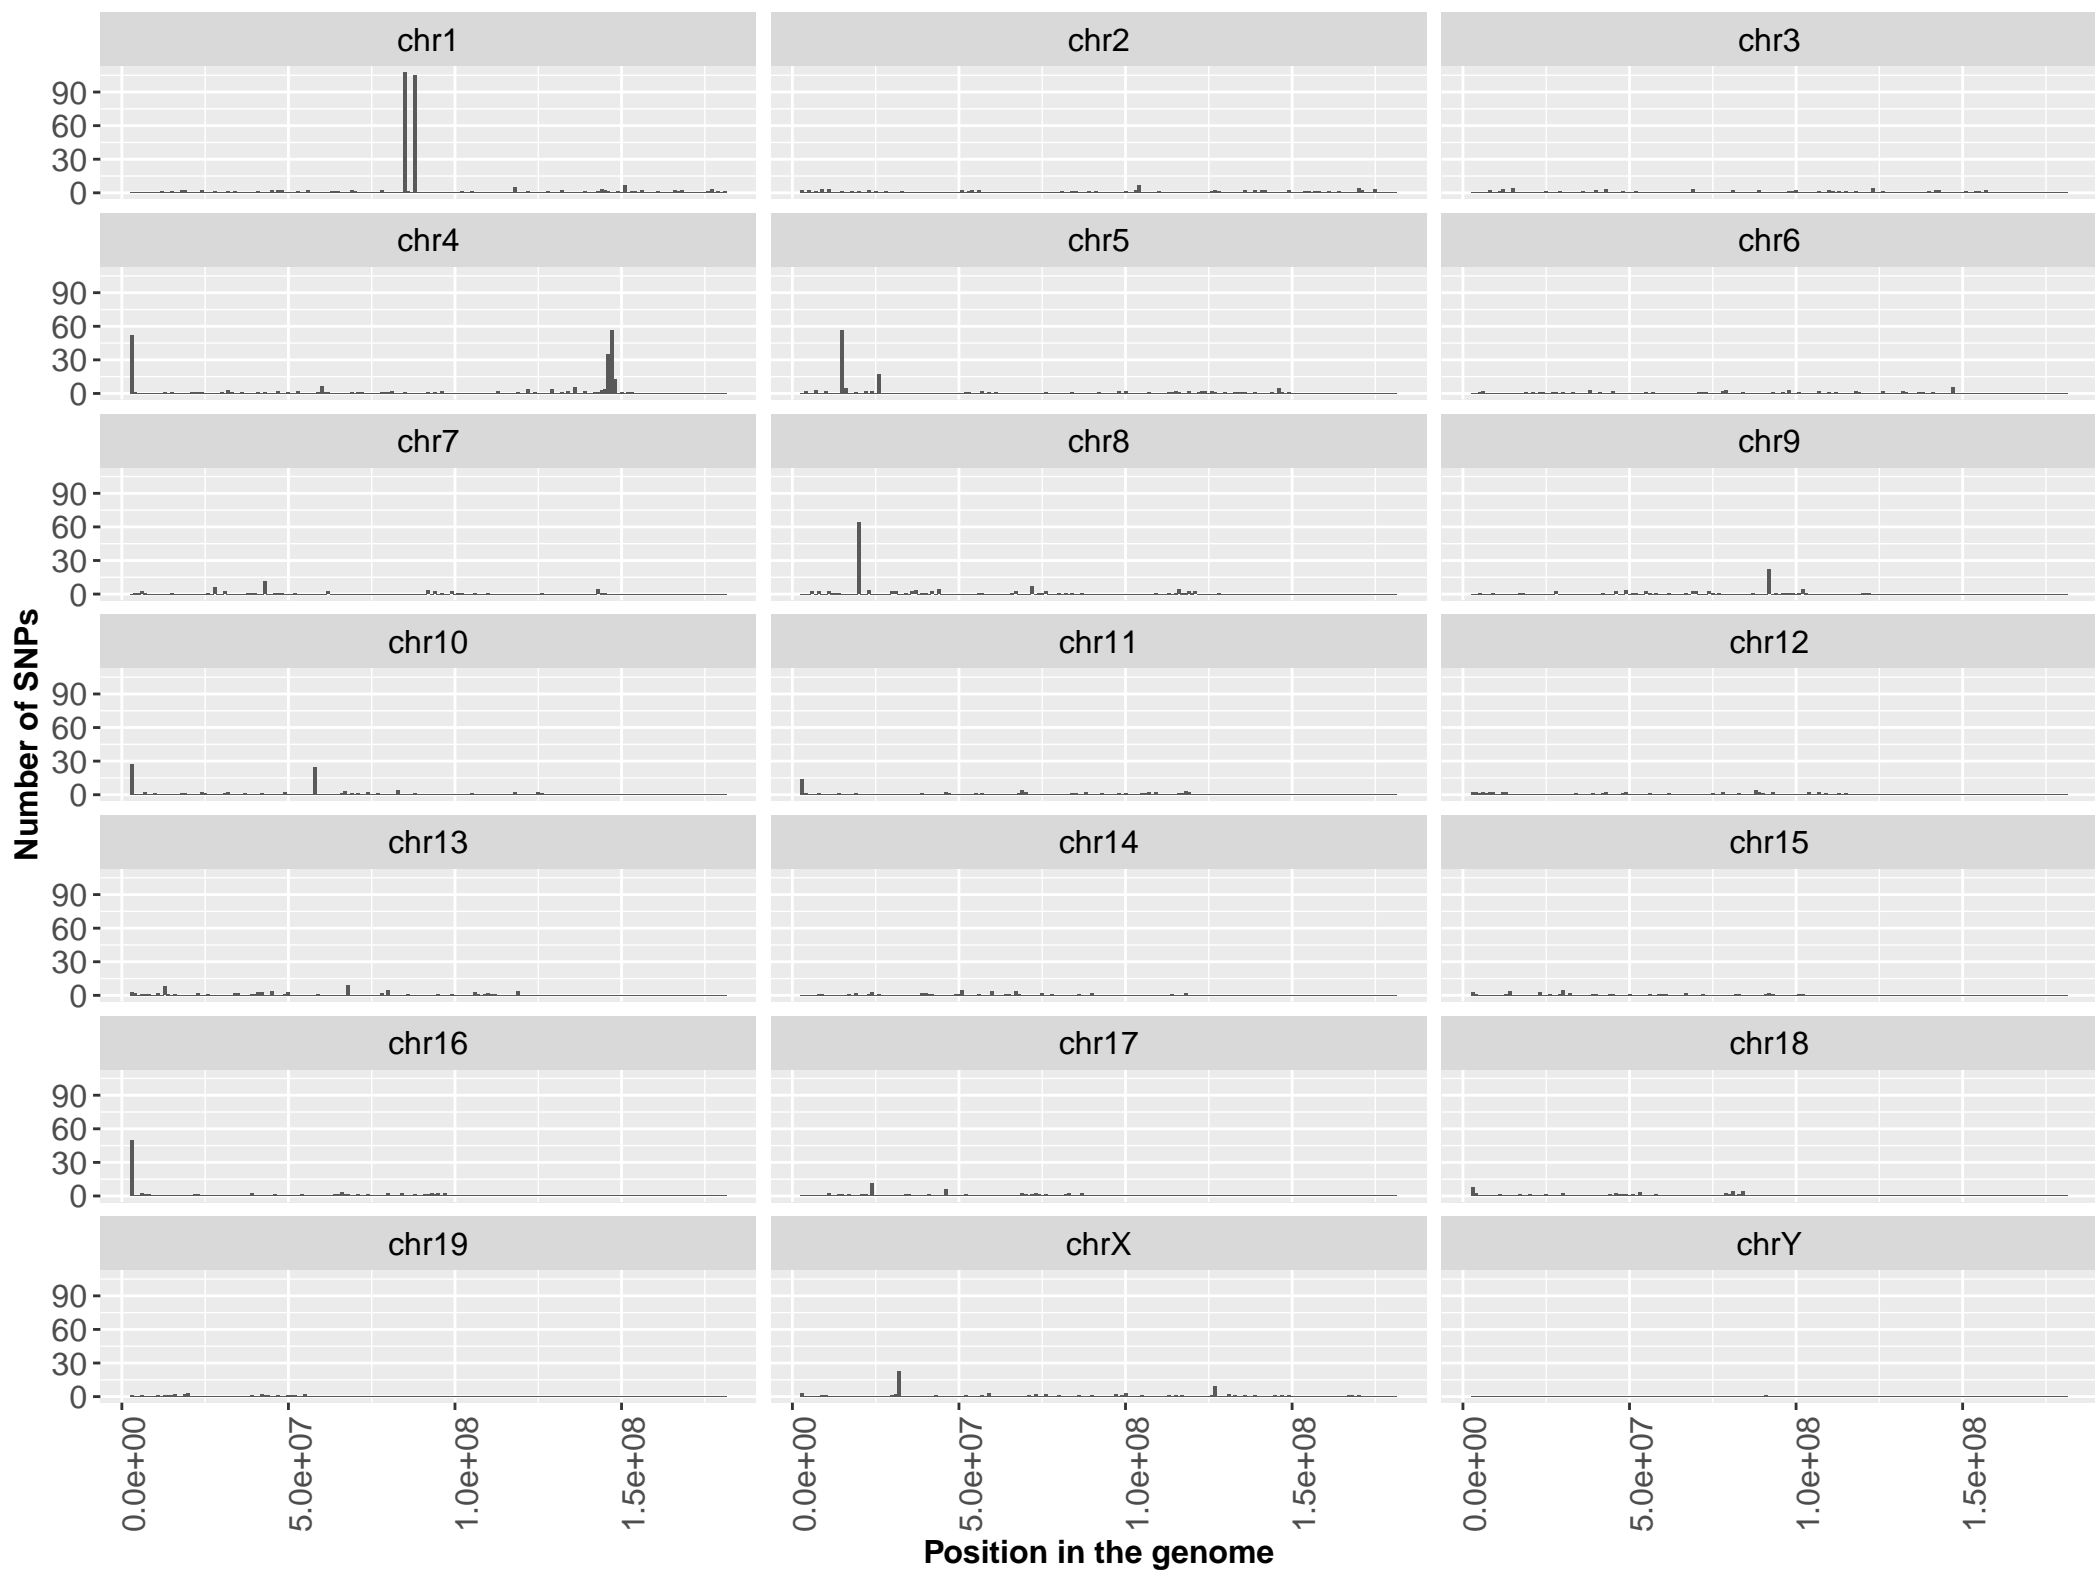

Supplement: Supplementary file 4 [file 1]
